# Supplementary material for: Association of history of cerebrovascular disease with severity of COVID-19
Source: Springer Nature journal article supplement (doi:10.1007/s00415-020-10121-0), 2020-08-06
Supplement: MOESM1 [file 18254176]

**Online Resource:** Complete search strings

**Article title:** Association of History of Cerebrovascular Disease with Severity of COVID-19

**Journal:** Journal of Neurology

**Authors:** Timo Siepmann, MD; Annahita Sedghi, MD; Jessica Barlinn, MD; Katja De With, MD, PhD; Lutz Mirow, MD; Martin Wolz, MD; Thomas Gruenewald, MD; Sina Helbig, MD; Percy Schroettner, MD; Simon Winzer, MD; Simone von Bonin, MD; Haidar Moustafa, MD; Lars-Peder Pallesen, MD; Bernhard Rosengarten, MD; Joerg Schubert, MD; Andreas Gueldner, MD; Peter Spieth, MD, MSc; Thea Koch, MD; Stefan Bornstein, MD; Heinz Reichmann, MD, PhD; Volker Puetz, MD; Kristian Barlinn, MD, MSc

**Corresponding Author**

Timo Siepmann, MD  
Department of Neurology  
University Hospital Carl Gustav Carus  
Technische Universität Dresden  
Fetscherstraße 74, 01307 Dresden  
Germany  
Phone: 0049-458-18578  
[timo.siepmann@ukdd.de](mailto:timo.siepmann@ukdd.de)

**Search strings**

Search strings applied to databases included the term „COVID-19“ in combination with the following medical subject headings.

*PubMed search string*

„COVID-19“ [All Fields] OR „COVID-2019“ [All Fields] OR „severe acute respiratory syndrome coronavirus“ [Supplementary Concept] OR „severe acute respiratory syndrome coronavirus 2“ [All Fields] OR „2019-nCoV [All Fields] OR „SARS-CoV-2“ [All Fields] OR „2019nCoV“ [All Fields] OR ((„Wuhan“ [All Fields] AND („coronavirus“ [MeSH Terms] OR „coronavirus“ [All Fields])) AND („2019/12“[PDAT] OR 2020[PDAT]))

*EMBASE search string*

„COVID-19“ OR „COVID-2019“ OR „severe acute respiratory syndrome coronavirus“ OR „severe acute respiratory syndrome coronavirus 2“ OR „2019-nCoV OR „SARS-CoV-2“ OR „2019nCoV“ OR „Wuhan“ AND „coronavirus“ OR „coronavirus“ AND „2019/12“ OR 2020

*Cochran library search string*

„COVID-19“
